# Supplementary material for: Worldwide co-occurrence analysis of 17 species of the genus Brachypodium using data mining
Source: PeerJ. 2019 Jan 14;6:e6193. doi: 10.7717/peerj.6193 (PMC6336012; doi:10.7717/peerj.6193)
Supplement: Supplemental Information 1 [file peerj-07-6193-s001.xlsx]

## Sheet: Sheet1
Generated rules. NOTE: In more than two rule' members, character '=>' separates antecedent and consequent termines
Distance	DATASET 1			Confident	Chi-square	P-value	Support	Lift
1000 m	B. sylvaticum	B. rupestre		1	24.775	1e-06	1	1
	B. rupestre	B. sylvaticum		1	24.775	1e-06	1	1
5000 m	B. sylvaticum	B. rupestre		1	408.871	0	1	1
	B. rupestre	B. sylvaticum		1	408.871	0	1	1
10000 m	B. sylvaticum	B. rupestre		1	2409.85	0	1	1
	B. rupestre	B. sylvaticum		1	2409.85	0	1	1
20000 m	B. sylvaticum	B. rupestre		1	8980.96	0	1	1
	B. rupestre	B. sylvaticum		1	8980.96	0	1	1
	DATASET 2
1000 m	B. hybridum	B. distachyon		0.703704	0.727273	0.393769	0.5	2
	B. distachyon	B. hybridum		1	0.727273	0.393769	0.5	1
	B. hybridum	B. stacei		0.407407	3.55556	0.059346	0.5	2
	B. stacei	B. hybridum		1	3.55556	0.059346	0.5	1
5000 m	B. hybridum	B. distachyon		0.615385	1.58065	0.208668	0.5	2
	B. distachyon	B. hybridum		1	1.58065	0.208668	0.5	1
	B. hybridum	B. stacei		0.487179	4.48148	0.034264	0.5	2
	B. stacei	B. hybridum		1	4.48148	0.034264	0.5	1
10000 m	B. hybridum	B. distachyon		0.576923	5.4878	0.01915	0.6	1.66667
	B. distachyon	B. hybridum		1	5.4878	0.01915	0.6	1
	B. hybridum	B. stacei		0.576923	7.41026	0.006485	0.6	1.66667
	B. stacei	B. hybridum		1	7.41026	0.006485	0.6	1
	B. stacei	B. distachyon	=>B. hybridum	1	9.96154	0.006869	0.2	1
20000 m	B. distachyon	B. stacei		0.310345	0.021277	0.884028	0.2	1.61836
	B. hybridum	B. distachyon		0.523364	17.8941	2.3e-05	0.4	1.61836
	B. distachyon	B. hybridum		0.965517	17.8941	2.3e-05	0.4	1.21377
	B. hybridum	B. stacei		0.626168	16.7907	4.2e-05	0.4	1.61836
	B. stacei	B. hybridum		0.971014	16.7907	4.2e-05	0.4	1.21377
	DATASET 3
1000 m	B. retusum	B. rupestre		1	3.69141	0.054693	1	1
	B. rupestre	B. retusum		1	3.69141	0.054693	1	1
5000 m	B. retusum	B. rupestre		1	0.285375	0.593199	1	1
	B. rupestre	B. retusum		1	0.285375	0.593199	1	1
10000 m	B. retusum	B. rupestre		1	8.97262	0.002741	1	1
	B. rupestre	B. retusum		1	8.97262	0.002741	1	1
20000 m	B. retusum	B. rupestre		1	21.5455	3e-06	1	1
	B. rupestre	B. retusum		1	21.5455	3e-06	1	1
	DATASET 4
1000 m	B. retusum	B. phoenicoides		0.938668	2600.77	0	0.5	1.98416
	B. phoenicoides	B. retusum		0.907545	2600.77	0	0.5	1.98416
	B. sylvaticum	B. pinnatum		0.847538	3271.64	0	0.5	1.98416
	B. pinnatum	B. sylvaticum		0.992081	3271.64	0	0.5	1.98416
5000 m	B. retusum	B. phoenicoides		0.926198	3607.25	0	0.5	1.9856
	B. phoenicoides	B. retusum		0.913587	3607.25	0	0.5	1.9856
	B. sylvaticum	B. pinnatum		0.852632	6660.02	0	0.5	1.9856
	B. pinnatum	B. sylvaticum		0.9928	6660.02	0	0.5	1.9856
10000 m	B. retusum	B. phoenicoides		0.946032	5136.61	0	0.333333	1.34468
	B. phoenicoides	B. retusum		0.925042	5136.61	0	0.333333	1.34468
	B. phoenicoides	B. sylvaticum		0.679307	55965.1	0	0.166667	1.00851
	B. sylvaticum	B. pinnatum		0.853627	14279.7	0	0.333333	2.01703
	B. pinnatum	B. sylvaticum		0.996413	14279.7	0	0.333333	1.00851
	B. retusum	B. sylvaticum		0.672342	33270	0	0.166667	1.00851
20000 m	B. retusum	B. phoenicoides		0.96901	5700.6	0	0.4375	1.99731
	B. phoenicoides	B. retusum		0.937494	5700.6	0	0.4375	1.99731
	B. sylvaticum	B. pinnatum		0.85482	20234	0	0.3125	2.66308
	B. pinnatum	B. sylvaticum		0.999372	20234	0	0.3125	1.22911
	B. retusum	B. sylvaticum		0.794662	40220.8	0	0.375	1.22911
	B. rupestre	B. sylvaticum		0.996504	79732.9	0	0.25	1.22911
	B. phoenicoides	B. sylvaticum		0.80164	65610.5	0	0.375	1.22911
	B. rupestre	B. pinnatum		0.978994	29605.2	0	0.25	2.66308
	B. retusum	=>B. sylvaticum	B. phoenicoides	0.764368	92271.2	0	0.3125	2.66308
	B. phoenicoides	=>B. retusum	B. sylvaticum	0.739508	92271.2	0	0.3125	2.66308
	B. retusum	B. phoenicoides	=>B. sylvaticum	0.788813	92271.2	0	0.3125	1.22911
	B. retusum	B. sylvaticum	=>B. phoenicoides	0.961878	92271.2	0	0.3125	1.99731
	B. sylvaticum	B. phoenicoides	=>B. retusum	0.922493	92271.2	0	0.3125	1.99731
	B. rupestre	=>B. sylvaticum	B. pinnatum	0.977675	85505.5	0	0.1875	3.19569
	B. sylvaticum	B. rupestre	=>B. pinnatum	0.981105	85505.5	0	0.1875	2.66308
	B. pinnatum	B. rupestre	=>B. sylvaticum	0.998653	85505.5	0	0.1875	1.22911
	DATASET 5
1000 m	B. retusum	B. phoenicoides		0.938668	2600.77	0	0.5	1.98416
	B. phoenicoides	B. retusum		0.907513	2600.77	0	0.5	1.98416
	B. sylvaticum	B. pinnatum		0.84753	3271.64	0	0.5	1.98416
	B. pinnatum	B. sylvaticum		0.992081	3271.64	0	0.5	1.98416
5000 m	B. retusum	B. phoenicoides		0.926198	3604.62	0	0.5	1.9856
	B. phoenicoides	B. retusum		0.913441	3604.62	0	0.5	1.9856
	B. sylvaticum	B. pinnatum		0.852624	6660.02	0	0.5	1.9856
	B. pinnatum	B. sylvaticum		0.9928	6660.02	0	0.5	1.9856
10000 m	B. retusum	B. phoenicoides		0.947049	2462.19	0	0.5	1.98495
	B. phoenicoides	B. retusum		0.909449	2462.19	0	0.5	1.98495
	B. sylvaticum	B. pinnatum		0.845625	3437.69	0	0.5	1.98495
	B. pinnatum	B. sylvaticum		0.992474	3437.69	0	0.5	1.98495
20000 m	B. retusum	B. phoenicoides		0.969011	5700.6	0	0.4375	1.99731
	B. phoenicoides	B. retusum		0.937472	5700.6	0	0.4375	1.99731
	B. sylvaticum	B. pinnatum		0.854804	20234.6	0	0.3125	2.66308
	B. pinnatum	B. sylvaticum		0.999372	20234.6	0	0.3125	1.22911
	B. retusum	B. sylvaticum		0.794668	40221.7	0	0.375	1.22911
	B. rupestre	B. sylvaticum		0.996504	79733.8	0	0.25	1.22911
	B. phoenicoides	B. sylvaticum		0.80165	65611.5	0	0.375	1.22911
	B. rupestre	B. pinnatum		0.978994	29605.2	0	0.25	2.66308
	B. retusum	=>B. sylvaticum	B. phoenicoides	0.764374	92272.9	0	0.3125	2.66308
	B. phoenicoides	=>B. retusum	B. sylvaticum	0.739496	92272.9	0	0.3125	2.66308
	B. retusum	B. phoenicoides	=>B. sylvaticum	0.788819	92272.9	0	0.3125	1.22911
	B. retusum	B. sylvaticum	=>B. phoenicoides	0.961879	92272.9	0	0.3125	1.99731
	B. sylvaticum	B. phoenicoides	=>B. retusum	0.922467	92272.9	0	0.3125	1.99731
	B. rupestre	=>B. sylvaticum	B. pinnatum	0.977676	85506.9	0	0.1875	3.19569
	B. sylvaticum	B. rupestre	=>B. pinnatum	0.981105	85506.9	0	0.1875	2.66308
	B. pinnatum	B. rupestre	=>B. sylvaticum	0.998653	85506.9	0	0.1875	1.22911
	DATASET 6
1000 m	B. retusum	B. phoenicoides		0.983872	2659.85	0	1	0.984695
	B. phoenicoides	B. retusum		0.984695	2659.85	0	1	0.984695
5000 m	B. retusum	B. phoenicoides		0.976506	3509.1	0	1	0.983929
	B. phoenicoides	B. retusum		0.983929	3509.1	0	1	0.983929
10000 m	B. retusum	B. phoenicoides		0.973294	5339.63	0	1	0.983211
	B. phoenicoides	B. retusum		0.983211	5339.63	0	1	0.983211
20000 m	B. hybridum	B. retusum		0.987073	21624.2	0	0.571429	1.16341
	B. retusum	B. phoenicoides		0.984089	5960.7	0	0.714286	1.16341
	B. phoenicoides	B. retusum		0.981004	5960.7	0	0.714286	1.16341
	B. hybridum	B. phoenicoides		0.966043	8158.63	0	0.571429	1.16341
	B. hybridum	=>B. retusum	B. phoenicoides	0.963342	23853.1	0	0.428571	1.39609
	B. retusum	B. hybridum	=>B. phoenicoides	0.975958	23853.1	0	0.428571	1.16341
	B. hybridum	B. phoenicoides	=>B. retusum	0.997204	23853.1	0	0.428571	1.16341
	DATASET 7
1000 m	B. retusum	B. phoenicoides		0.931942	2657.12	0	0.5	1.98416
	B. phoenicoides	B. retusum		0.907045	2657.12	0	0.5	1.98416
	B. sylvaticum	B. pinnatum		0.845996	3322.91	0	0.5	1.98416
	B. pinnatum	B. sylvaticum		0.992081	3322.91	0	0.5	1.98416
5000 m	B. retusum	B. phoenicoides		0.918455	3712.3	0	0.5	1.9855
	B. phoenicoides	B. retusum		0.913395	3712.3	0	0.5	1.9855
	B. sylvaticum	B. pinnatum		0.8498	6730.57	0	0.5	1.9855
	B. pinnatum	B. sylvaticum		0.99275	6730.57	0	0.5	1.9855
10000 m	B. retusum	B. phoenicoides		0.939604	5257.01	0	0.333333	1.34022
	B. phoenicoides	B. retusum		0.92489	5257.01	0	0.333333	1.34022
	B. phoenicoides	B. sylvaticum		0.680824	56092.8	0	0.166667	1.00516
	B. sylvaticum	B. pinnatum		0.850706	14372	0	0.333333	2.01033
	B. pinnatum	B. sylvaticum		0.996268	14372	0	0.333333	1.00516
	B. retusum	B. sylvaticum		0.670109	33102.3	0	0.166667	1.00516
20000 m	B. retusum	B. phoenicoides		0.966794	5736.38	0	0.4375	1.99731
	B. phoenicoides	B. retusum		0.937156	5736.38	0	0.4375	1.99731
	B. sylvaticum	B. pinnatum		0.852037	20336.3	0	0.3125	2.66308
	B. pinnatum	B. sylvaticum		0.999212	20336.3	0	0.3125	1.22911
	B. retusum	B. sylvaticum		0.794037	40234.3	0	0.375	1.22911
	B. rupestre	B. sylvaticum		0.996292	79907.3	0	0.25	1.22911
	B. phoenicoides	B. sylvaticum		0.802302	65731.9	0	0.375	1.22911
	B. rupestre	B. pinnatum		0.978731	29614.5	0	0.25	2.66308
	B. retusum	=>B. sylvaticum	B. phoenicoides	0.763914	92374.5	0	0.3125	2.66308
	B. phoenicoides	=>B. retusum	B. sylvaticum	0.740496	92374.5	0	0.3125	2.66308
	B. retusum	B. phoenicoides	=>B. sylvaticum	0.790152	92374.5	0	0.3125	1.22911
	B. retusum	B. sylvaticum	=>B. phoenicoides	0.962064	92374.5	0	0.3125	1.99731
	B. sylvaticum	B. phoenicoides	=>B. retusum	0.922963	92374.5	0	0.3125	1.99731
	B. rupestre	=>B. sylvaticum	B. pinnatum	0.977413	85748.3	0	0.1875	3.19569
	B. sylvaticum	B. rupestre	=>B. pinnatum	0.981051	85748.3	0	0.1875	2.66308
	B. pinnatum	B. rupestre	=>B. sylvaticum	0.998654	85748.3	0	0.1875	1.22911
