# Supplementary material for: Worldwide co-occurrence analysis of 17 species of the genus Brachypodium using data mining
Source: PeerJ. 2019 Jan 14;6:e6193. doi: 10.7717/peerj.6193 (PMC6336012; doi:10.7717/peerj.6193)
Supplement: Supplemental Information 2 [file peerj-07-6193-s002.xlsx]

## Sheet: Sheet1
Positive-generated rules. NOTE: In more than two rule's member, character '=>' separates antecedent and consequent termines
Distance	DATASET 2
20 K	B. hybridum	B. distachyon
	B. distachyon	B. hybridum
	B. hybridum	B. stacei
	B. stacei	B. hybridum
Distance	DATASET 4
1 K	B. retusum	B. phoenicoides
	B. phoenicoides	B. retusum
	B. sylvaticum	B. pinnatum
	B. pinnatum	B. sylvaticum
5 K	B. retusum	B. phoenicoides
	B. phoenicoides	B. retusum
	B. sylvaticum	B. pinnatum
	B. pinnatum	B. sylvaticum
10 K	B. retusum	B. phoenicoides
	B. phoenicoides	B. retusum
	B. phoenicoides	B. sylvaticum
	B. sylvaticum	B. pinnatum
	B. pinnatum	B. sylvaticum
	B. retusum	B. sylvaticum
20 K	B. retusum	B. phoenicoides
	B. phoenicoides	B. retusum
	B. sylvaticum	B. pinnatum
	B. pinnatum	B. sylvaticum
	B. retusum	B. sylvaticum
	B. rupestre	B. sylvaticum
	B. phoenicoides	B. sylvaticum
	B. rupestre	B. pinnatum
	B. retusum	=>B. sylvaticum	B. phoenicoides
	B. phoenicoides	=>B. retusum	B. sylvaticum
	B. retusum	B. phoenicoides	=>B. sylvaticum
	B. retusum	B. sylvaticum	=>B. phoenicoides
	B. sylvaticum	B. phoenicoides	=>B. retusum
	B. rupestre	=>B. sylvaticum	B. pinnatum
	B. sylvaticum	B. rupestre	=>B. pinnatum
	B. pinnatum	B. rupestre	=>B. sylvaticum
Distance	DATASET 5
1 K	B. retusum	B. phoenicoides
	B. phoenicoides	B. retusum
	B. sylvaticum	B. pinnatum
	B. pinnatum	B. sylvaticum
5 K	B. retusum	B. phoenicoides
	B. phoenicoides	B. retusum
	B. sylvaticum	B. pinnatum
	B. pinnatum	B. sylvaticum
10 K	B. retusum	B. phoenicoides
	B. phoenicoides	B. retusum
	B. sylvaticum	B. pinnatum
	B. pinnatum	B. sylvaticum
20 K	B. retusum	B. phoenicoides
	B. phoenicoides	B. retusum
	B. sylvaticum	B. pinnatum
	B. pinnatum	B. sylvaticum
	B. retusum	B. sylvaticum
	B. rupestre	B. sylvaticum
	B. phoenicoides	B. sylvaticum
	B. rupestre	B. pinnatum
	B. retusum	=>B. sylvaticum	B. phoenicoides
	B. phoenicoides	=>B. retusum	B. sylvaticum
	B. retusum	B. phoenicoides	=>B. sylvaticum
	B. retusum	B. sylvaticum	=>B. phoenicoides
	B. sylvaticum	B. phoenicoides	=>B. retusum
	B. rupestre	=>B. sylvaticum	B. pinnatum
	B. sylvaticum	B. rupestre	=>B. pinnatum
	B. pinnatum	B. rupestre	=>B. sylvaticum
Distance	DATASET 6
20 K	B. hybridum	B. retusum
	B. retusum	B. phoenicoides
	B. phoenicoides	B. retusum
	B. hybridum	B. phoenicoides
	B. hybridum	=>B. retusum	B. phoenicoides
	B. retusum	B. hybridum	=>B. phoenicoides
	B. hybridum	B. phoenicoides	=>B. retusum
	DATASET 7
1 K	B. retusum	B. phoenicoides
	B. phoenicoides	B. retusum
	B. sylvaticum	B. pinnatum
	B. pinnatum	B. sylvaticum
5 K	B. retusum	B. phoenicoides
	B. phoenicoides	B. retusum
	B. sylvaticum	B. pinnatum
	B. pinnatum	B. sylvaticum
10 K	B. retusum	B. phoenicoides
	B. phoenicoides	B. retusum
	B. phoenicoides	B. sylvaticum
	B. sylvaticum	B. pinnatum
	B. pinnatum	B. sylvaticum
	B. retusum	B. sylvaticum
20 K	B. retusum	B. phoenicoides
	B. phoenicoides	B. retusum
	B. sylvaticum	B. pinnatum
	B. pinnatum	B. sylvaticum
	B. retusum	B. sylvaticum
	B. rupestre	B. sylvaticum
	B. phoenicoides	B. sylvaticum
	B. rupestre	B. pinnatum
	B. retusum	=>B. sylvaticum	B. phoenicoides
	B. phoenicoides	=>B. retusum	B. sylvaticum
	B. retusum	B. phoenicoides	=>B. sylvaticum
	B. retusum	B. sylvaticum	=>B. phoenicoides
	B. sylvaticum	B. phoenicoides	=>B. retusum
	B. rupestre	=>B. sylvaticum	B. pinnatum
	B. sylvaticum	B. rupestre	=>B. pinnatum
	B. pinnatum	B. rupestre	=>B. sylvaticum
